# Supplementary material for: HS-SPME-MS-Enose Coupled with Chemometrics as an Analytical Decision Maker to Predict In-Cup Coffee Sensory Quality in Routine Controls: Possibilities and Limits
Source: MDPI journal article supplement (doi:10.3390/molecules24244515), 2019-12-10
Supplement: s1 [file s1]

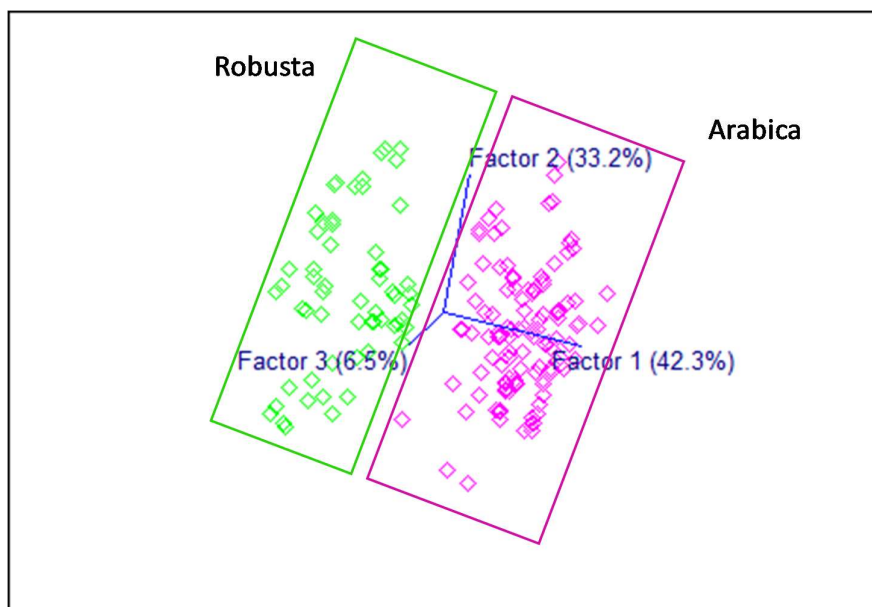

Figure S1. PCA scores plot of the coffee samples. Pre-processing: Pareto scaling
